# Supplementary material for: A Study of the Occurrence of Aflatoxin M1 in Milk Supply Chain over a Seven-Year Period (2014–2020): Human Exposure Assessment and Risk Characterization in the Population of Central Italy
Source: MDPI journal article supplement (doi:10.3390/foods10071529), 2021-07-02
Supplement: s1 [file foods-1267496supplement.pdf › foods-1267496supplement.pdf]

Table S1. Detailed consumption data of dairy products of entire central Italy population (g /kg bw/ day)

|                  | Toddler |        | Children |       | Adolescents |       | Adults |      | Elderly |      |
|------------------|---------|--------|----------|-------|-------------|-------|--------|------|---------|------|
|                  | 50P     | 99P    | 50P      | 99P   | 50P         | 99P   | 50P    | 99P  | 50P     | 99P  |
| Milk             | 43.60   | 183.30 | 10.90    | 37.20 | 4.40        | 11.90 | 2.90   | 8.50 | 3.00    | 8.10 |
| Soft cheese      | 1.04    | 1.53   | 0.86     | 1.26  | 0.55        | 0.70  | 0.39   | 0.61 | 0.35    | 0.62 |
| Semi-soft cheese | 0.04    | 0.26   | 0.04     | 0.21  | 0.02        | 0.12  | 0.02   | 0.10 | 0.01    | 0.10 |
| Semi-hard cheese | 0.13    | 0.39   | 0.11     | 0.32  | 0.07        | 0.18  | 0.05   | 0.15 | 0.04    | 0.16 |
| Ewe cheese       | 0.07    | 0.18   | 0.06     | 0.21  | 0.03        | 0.50  | 0.03   | 0.50 | 0.02    | 0.18 |

Table S2. The direction and magnitude of individual uncertainty and the combined effect of all the uncertainties affecting the exposure assessment

| Source of uncertainty                                                                                           | Direction and magnitude |
|-----------------------------------------------------------------------------------------------------------------|-------------------------|
| Measurement uncertainty (analytical variation, and measurements below the limit of detection or quantification) | +/-                     |
| Size and variability of analytical data set                                                                     | +/-                     |
| Influence of non-detects in analysis                                                                            | ++/--                   |
| Treatment of non-detects for exposure assessment                                                                | +                       |
| Default bodyweight for age groups with no gender diversification                                                | ++/--                   |
| Consumer population selection bias                                                                              | from +/- to +++/---     |
| Extrapolation of cheese contamination (use of concentration factors)                                            | from +/- to ++/--       |
| Conservative assumption that individual consumers consume food categories at 99th percentile                    | ++                      |
| Exclusion of some cheese categories with high levels of contamination                                           | -                       |
| <b>Qualitative evaluation of overall effect of identified uncertainties:</b>                                    | <b>++</b>               |
